# Supplementary material for: Boosting the transport kinetics of free-standing SnS2@Carbon nanofibers by electronic structure modulation for advanced lithium storage
Source: Royal Society of Chemistry journal article supplement (doi:10.1039/d2ta01392d), 2022-01-01
Supplement: d2ta01392d1.pdf [file d2ta01392d1.pdf]

Electronic Supplementary Information

**Boosting Transport Kinetics of Free-Standing SnS<sub>2</sub>@Carbon Nanofibers by  
Electronic Structure Modulation for Advanced Lithium Storage**

Hui Jiang,<sup>a, 1</sup> Yang Gan,<sup>a, 1</sup> Jie Liu,<sup>a</sup> Xunlu Wang,<sup>a</sup> Ruguang Ma,<sup>c</sup> Jianjun Liu\*<sup>a</sup> and Jiacheng Wang\*<sup>a, b</sup>

<sup>a</sup> State Key Laboratory of High-Performance Ceramics and Superfine Microstructure, Shanghai Institute of Ceramics, Chinese Academy of Sciences, Shanghai 200050, China.

<sup>b</sup> Center of Materials Science and Optoelectronics Engineering, University of Chinese Academy of Sciences, Beijing 100049, China

<sup>c</sup> School of Materials Science and Engineering, Suzhou University of Science and Technology, 99 Xuefu Road Suzhou, 215011, China.

<sup>1</sup> These authors contributed equally to this work.

Email: [jliu@mail.sic.ac.cn](mailto:jliu@mail.sic.ac.cn); [jiacheng.wang@mail.sic.ac.cn](mailto:jiacheng.wang@mail.sic.ac.cn)

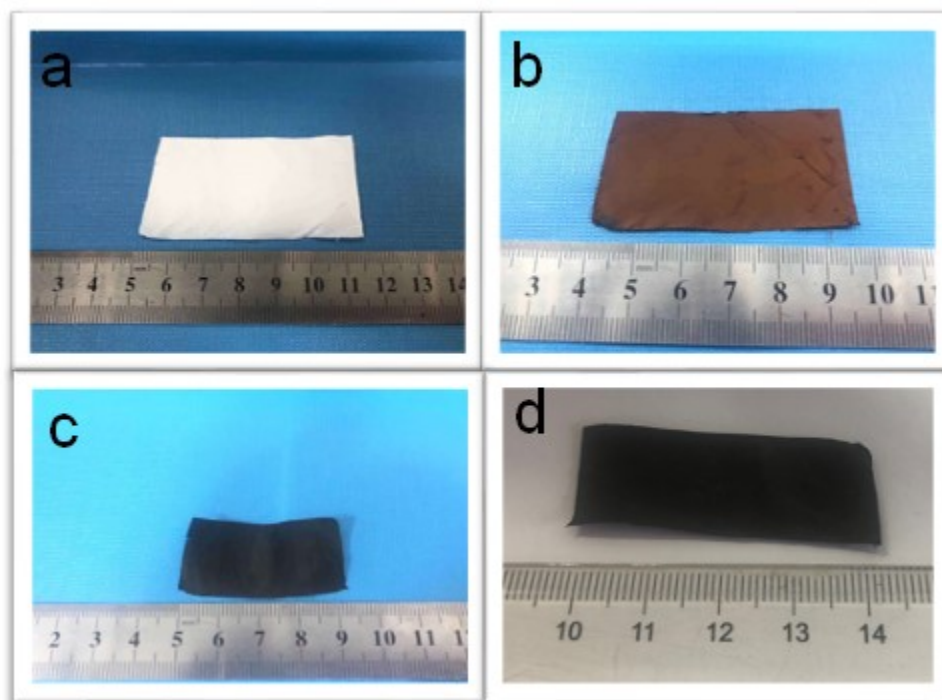

**Fig S1.** Digital photos of a) Sn, Mg-containing polymer membrane. The membrane was calcinated at 250 °C in air b), sintered at 700 °C in Ar c). d) The final free-standing electrodes after a sulfidation process.

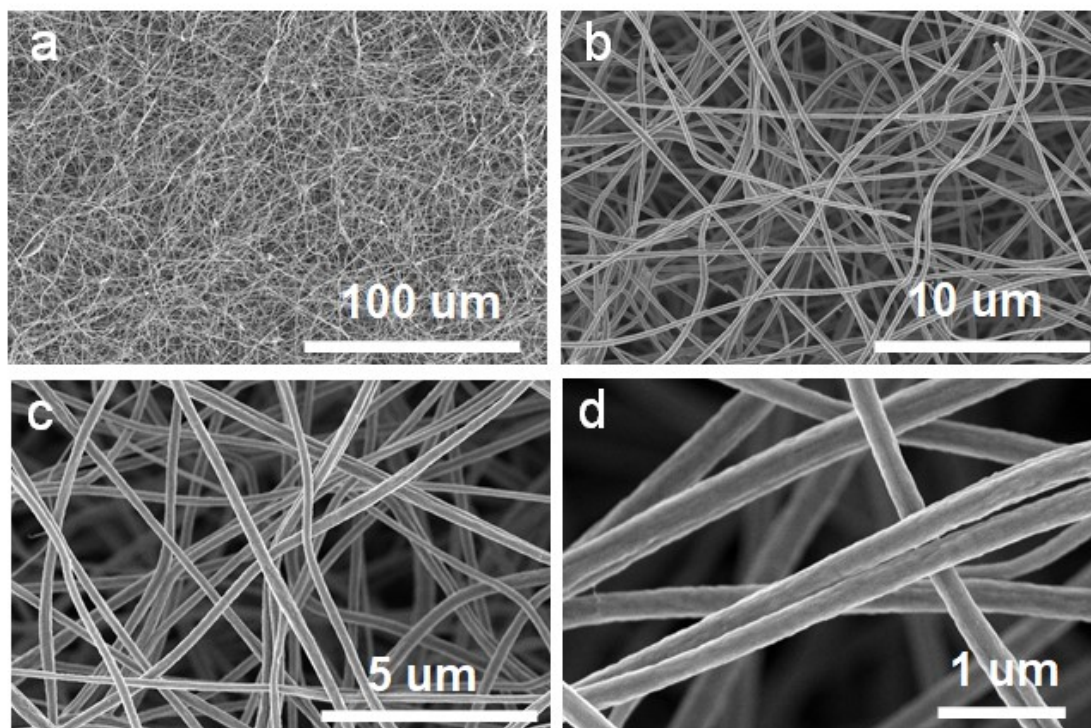

**Fig S2.** The SEM images of Sn/CNFs.

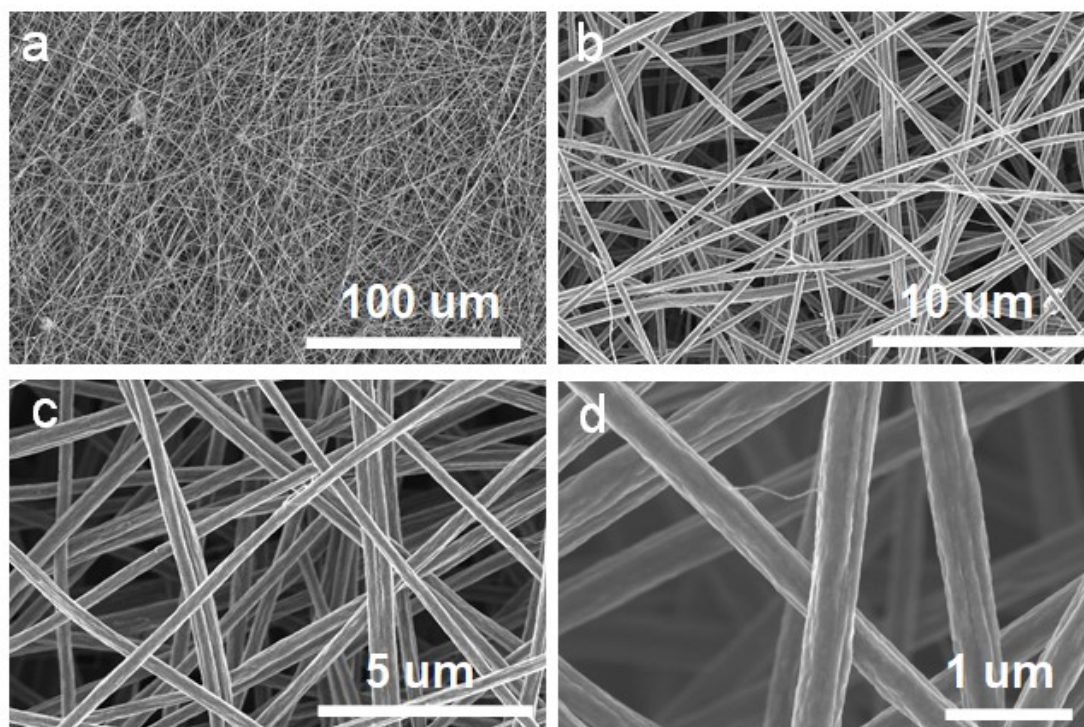

**Fig S3.** SEM images of Mg-Sn/CNFs.



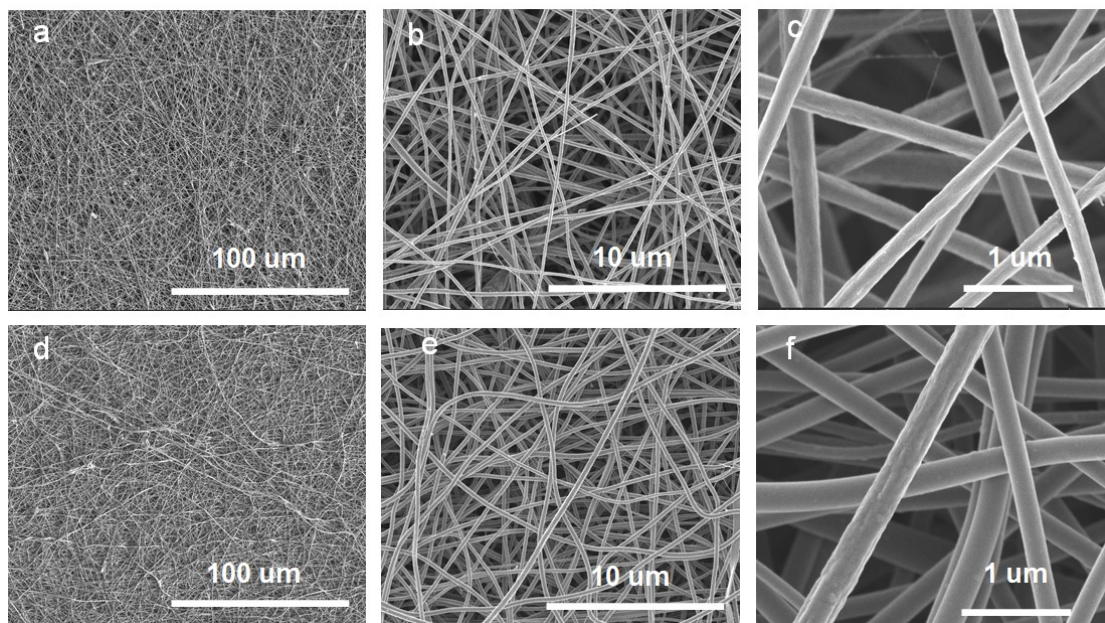

**Fig S4.** SEM images of SnS<sub>2</sub>/CNFs (a-c) and Mg-SnS<sub>2</sub>/CNFs (d-f).

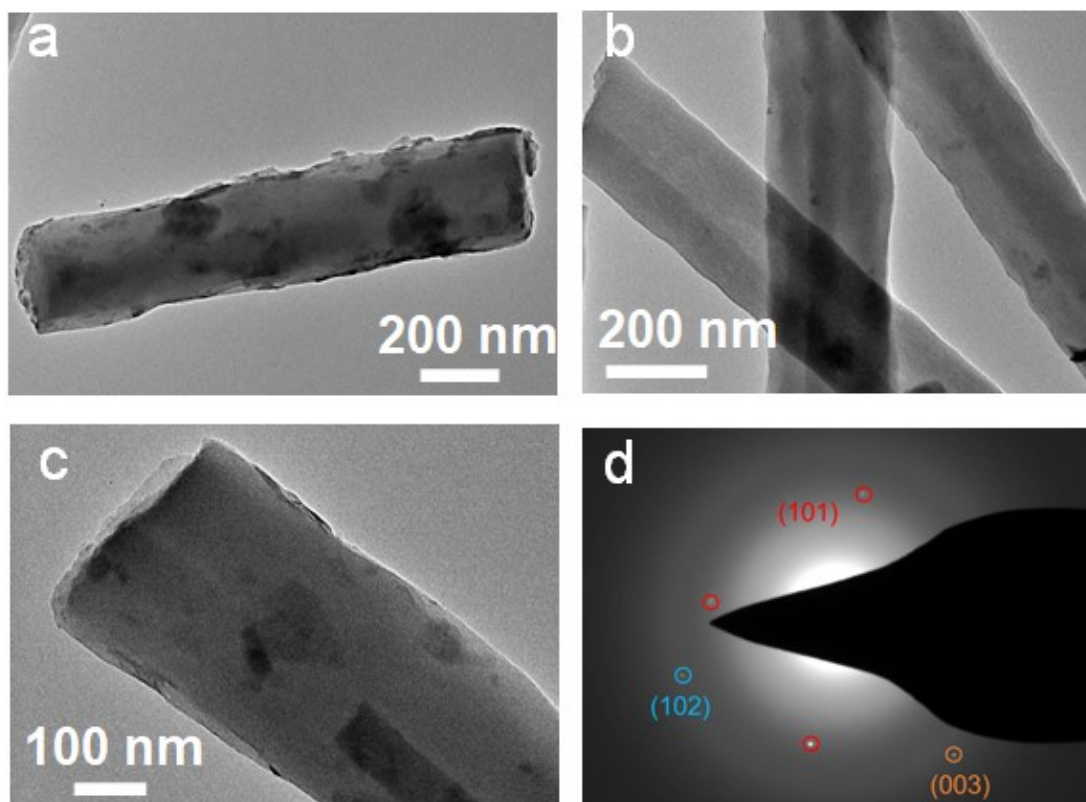

**Fig S5.** TEM images of SnS<sub>2</sub>/CNFs (a-c); Corresponding SAED images of SnS<sub>2</sub>/CNFs (d).

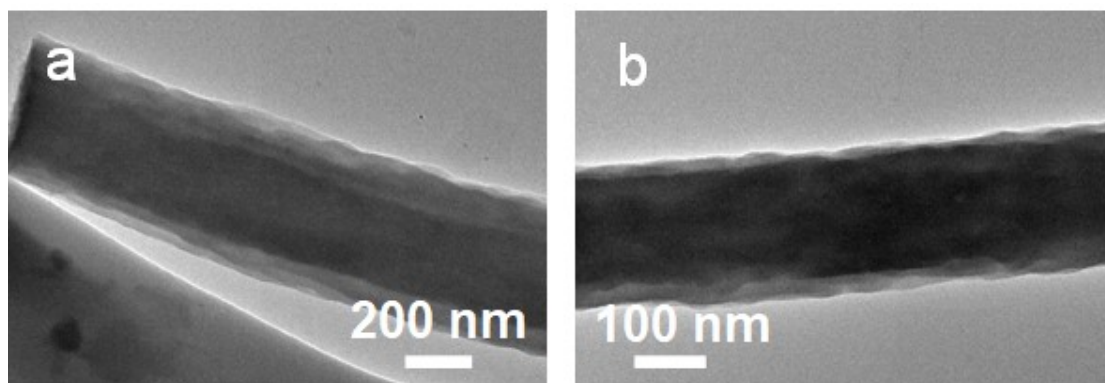

**Fig S6.** TEM images of Mg-SnS<sub>2</sub>/CNFs (a-b).

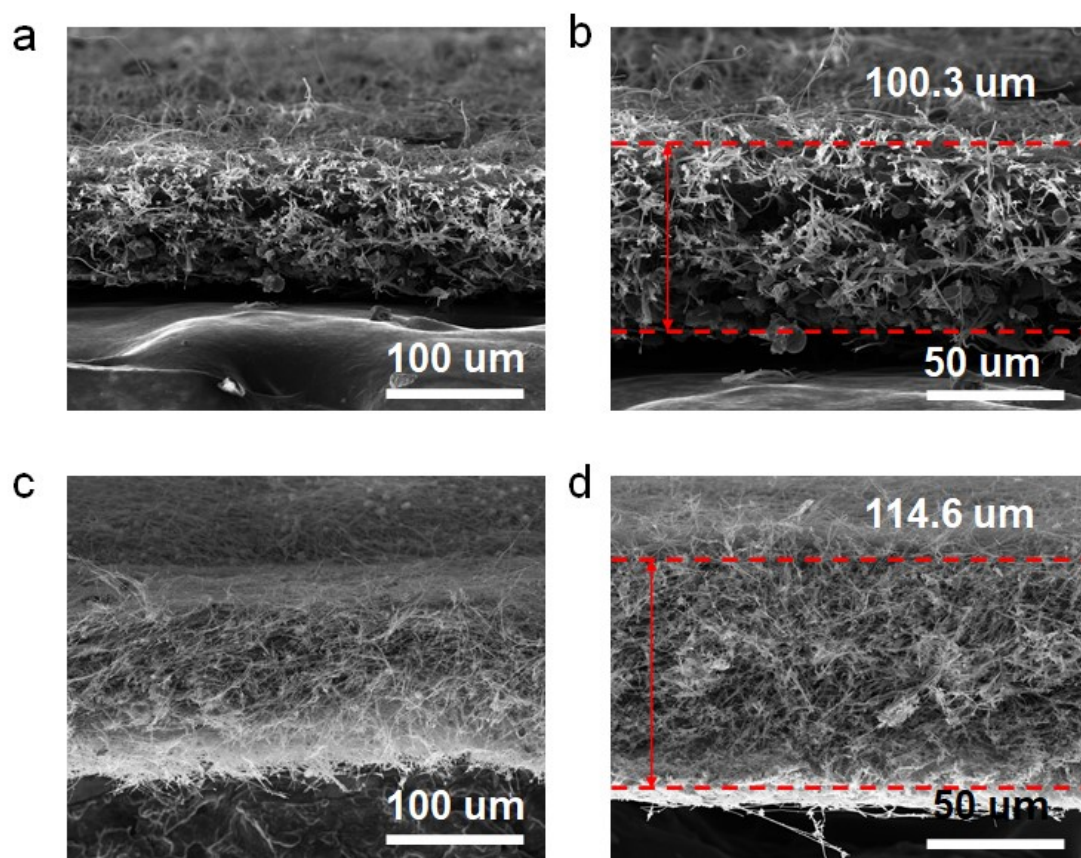

**Fig S7.** Cross-sectional SEM images of the (a-b) SnS<sub>2</sub>/CNFs and (c-d) Mg-SnS<sub>2</sub>/CNFs electrodes before cycling.

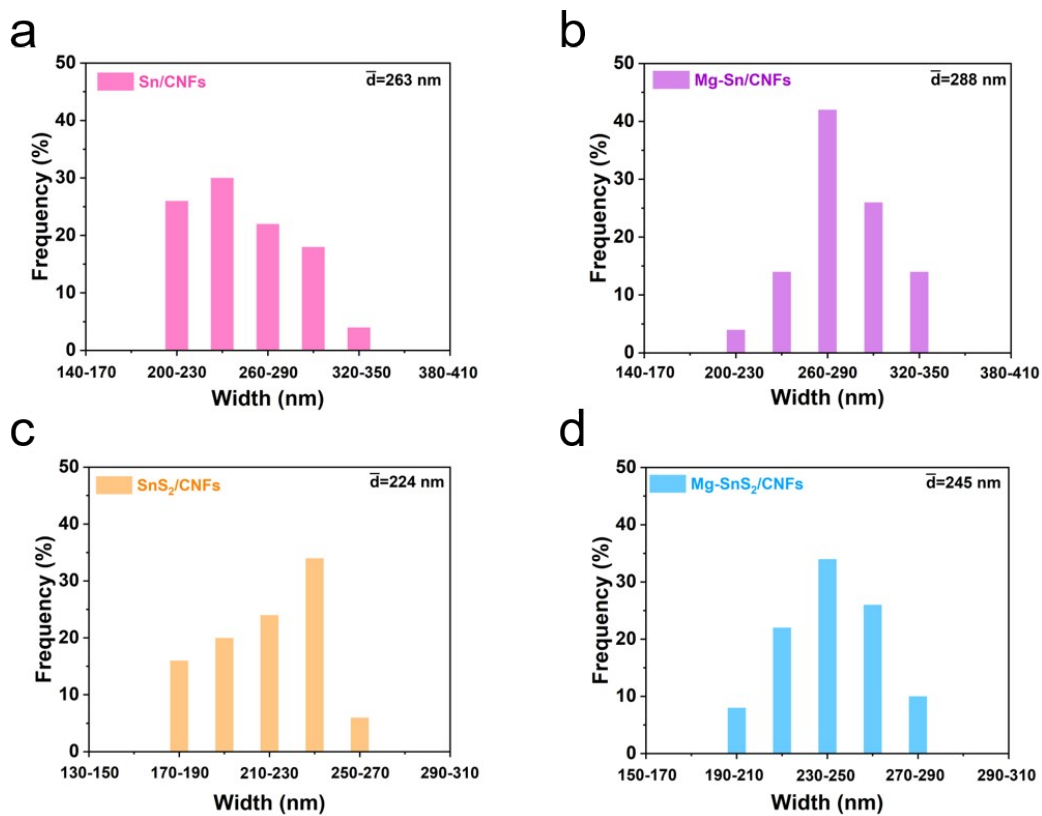

**Fig S8.** Fiber width distributions of Sn/CNFs (a), Mg-Sn/CNFs (b), SnS<sub>2</sub>/CNFs (c), and Mg-SnS<sub>2</sub>/CNFs (d).

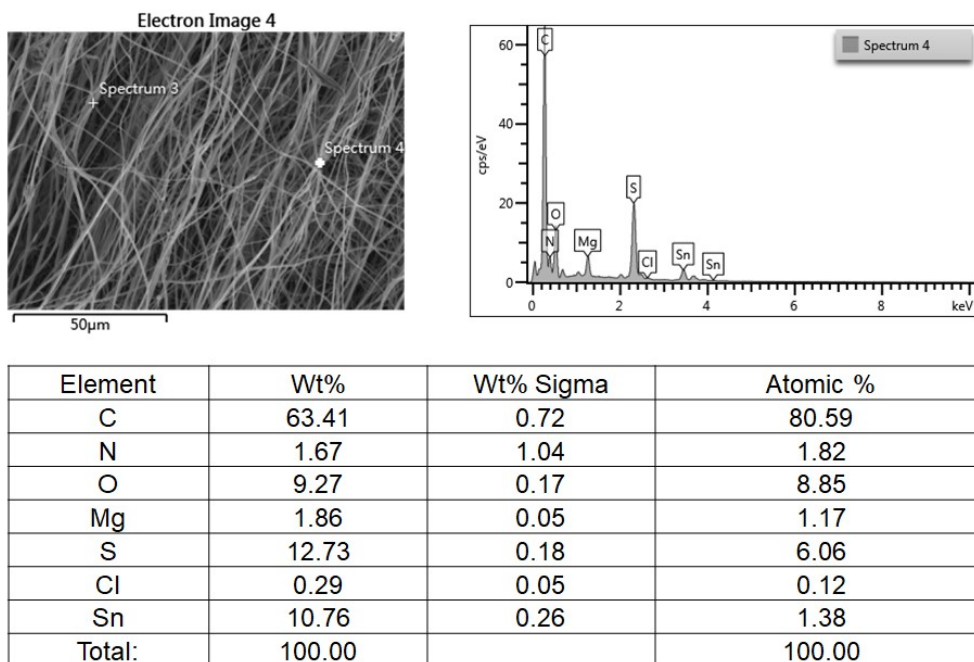

**Fig S9.** a) SEM image, b) EDX spectrum of Mg-SnS<sub>2</sub>/CNFs and c) the corresponding elemental content.

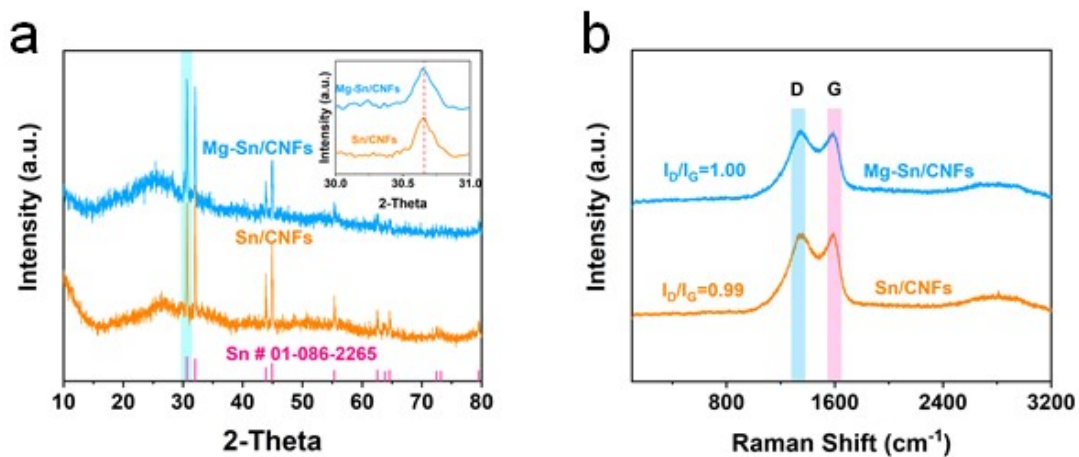

**Fig S10.** XRD patterns of (a) Sn/CNFs and Mg-Sn/CNFs. (b) Raman spectra of Sn/CNFs and Mg-Sn/CNFs.



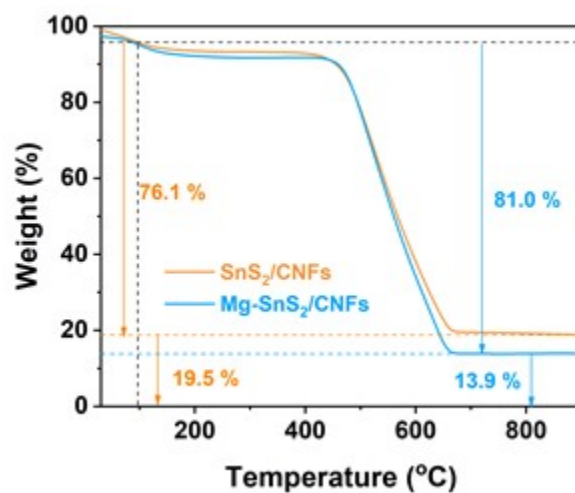

**Fig S11.** TGA curves of SnS<sub>2</sub>/CNFs and Mg-SnS<sub>2</sub>/CNFs.

$$n = \frac{n_2}{n_1 + n_2} \times \frac{M_{SnS_2}}{M_{SnO_2}} = \frac{19.5\%}{19.5\% + 76.1\%} * \frac{182.9}{150.4} = 24.8\%$$

Where  $n_1$  represents the weight of percentage of carbon nanofibers,  $n_2$  represents the mass of final production,  $M_{SnS_2}$  represents the mole mass of SnS<sub>2</sub>, and  $M_{SnO_2}$  represents the mole mass of SnO<sub>2</sub>.



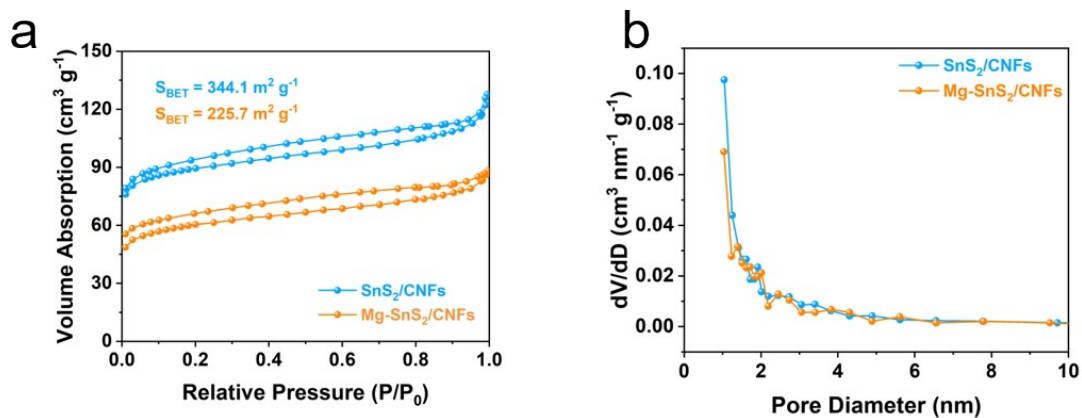

**Fig S12.** (a) The  $N_2$  adsorption-desorption analysis of  $SnS_2/CNFs$  and  $Mg-SnS_2/CNFs$ . (b) The pore size distribution of  $SnS_2/CNFs$  and  $Mg-SnS_2/CNFs$ .

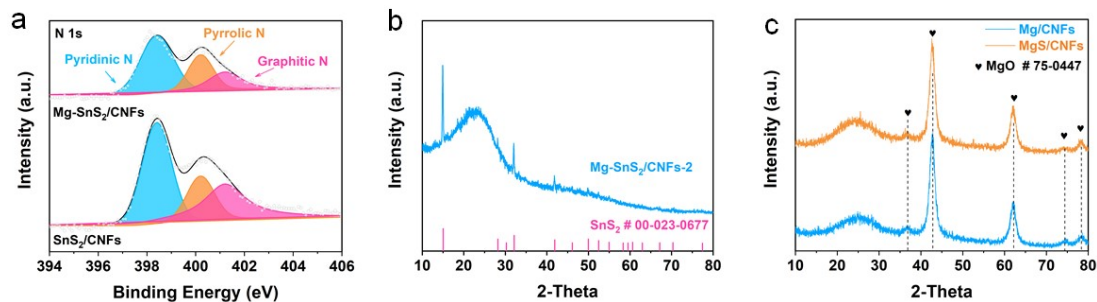

**Fig S13.** (a) XPS spectra of the  $SnS_2/CNFs$  and  $Mg-SnS_2/CNFs$  electrode for N 1s. (b) XRD patterns of  $Mg-SnS_2/CNFs-2$ . (c) XRD patterns of  $Mg/CNFs$  and  $Mg-S/CNFs$ .

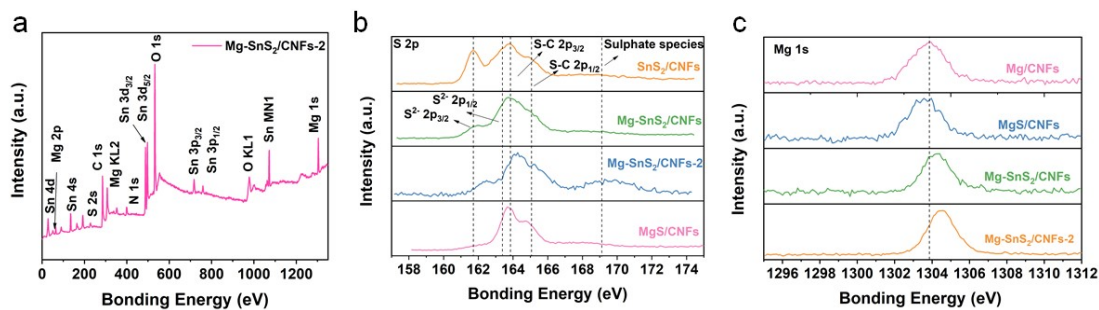

**Fig S14.** (a) XPS survey spectrum of the Mg-SnS<sub>2</sub>/CNFs-2. Corresponding high-resolution spectrum of (b) S 2p and (c) Mg 1s for Mg/CNFs, Mg-S/CNFs, Mg-SnS<sub>2</sub>/CNFs, Mg-SnS<sub>2</sub>/CNFs-2, and SnS<sub>2</sub>/CNFs.

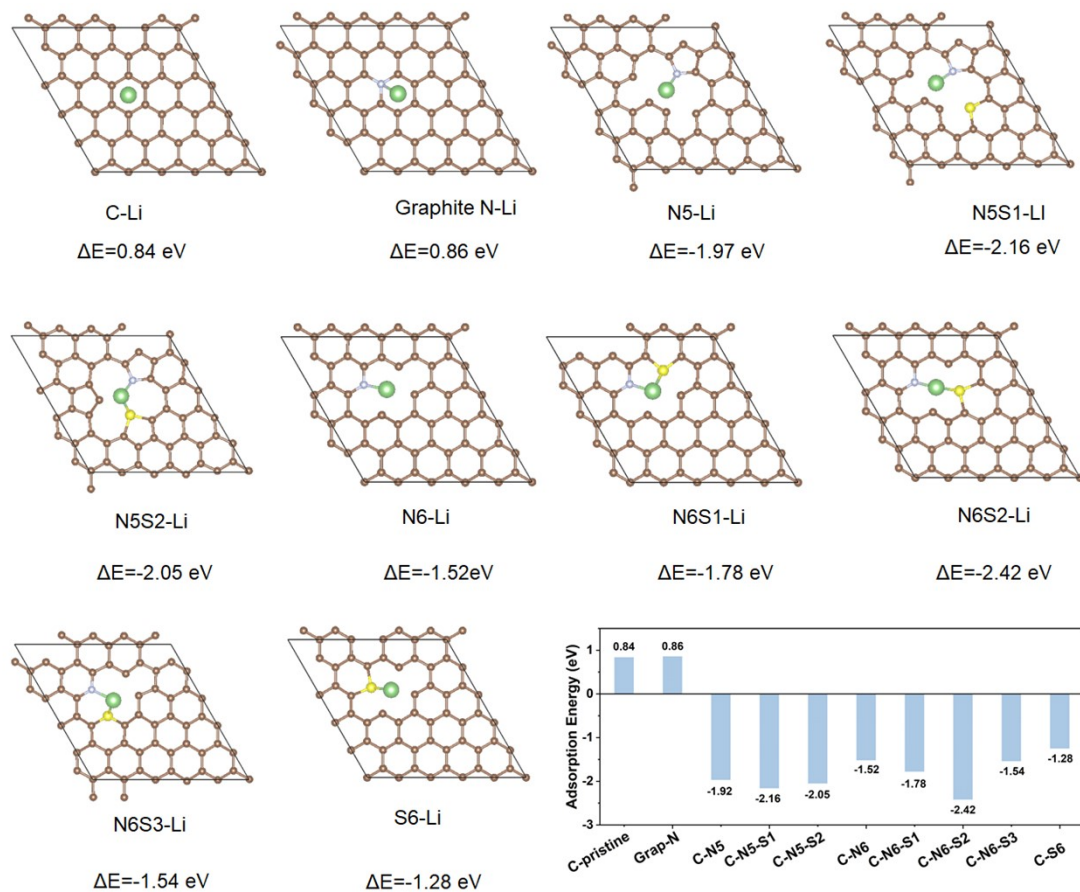

**Fig S15.** Theoretical results of Li adsorption on various sites (brown-carbon, yellow-sulfur, and green-lithium) and a survey of the calculated values of the adsorption energy.

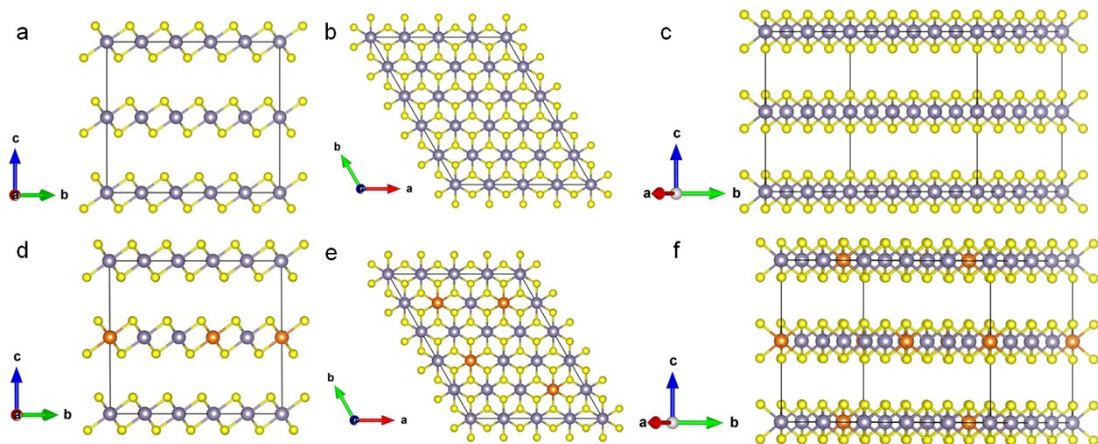

**Fig S16.** The detailed structure of  $\text{SnS}_2$  (a-c) and  $\text{Mg-SnS}_2$  (d-f) at different perspectives.

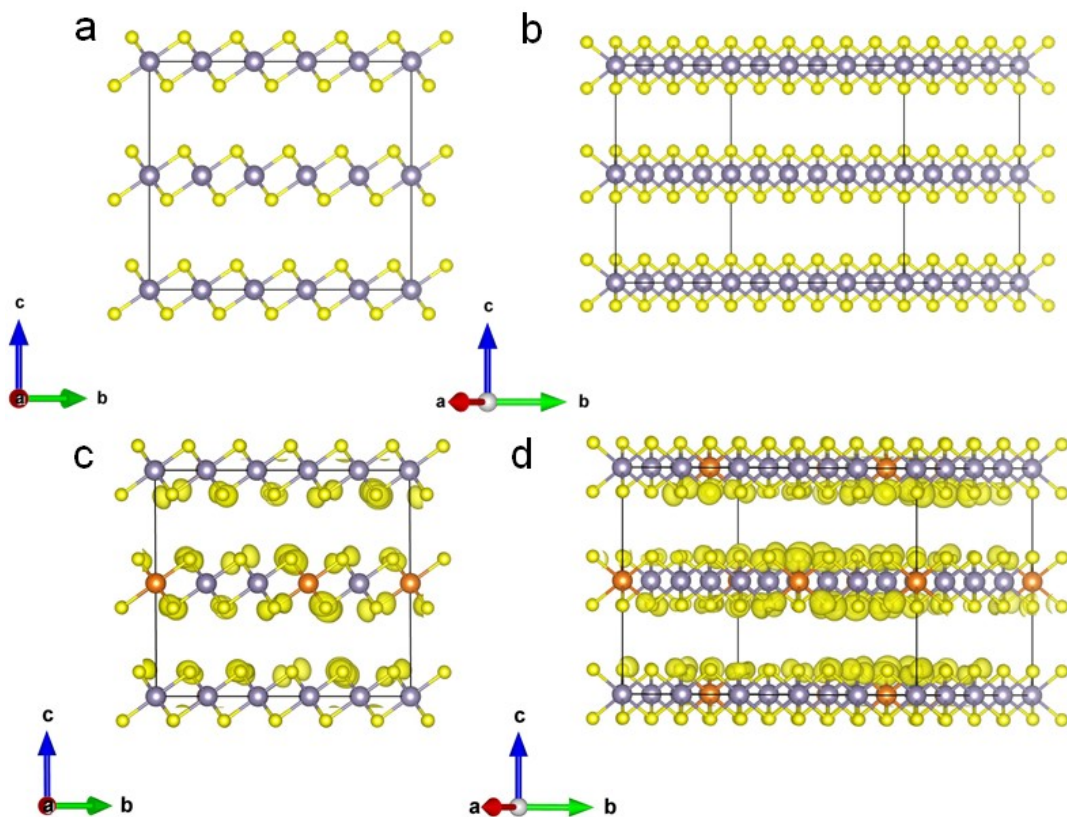

**Fig S17.** Calculated spin density distribution of pure (a-b) and  $\text{Mg-doped}$  (c-d)  $\text{SnS}_2$  (isosurface level =  $2.696 \times 10^{-3} \text{ e}/\text{\AA}^3$ ) at different perspectives.



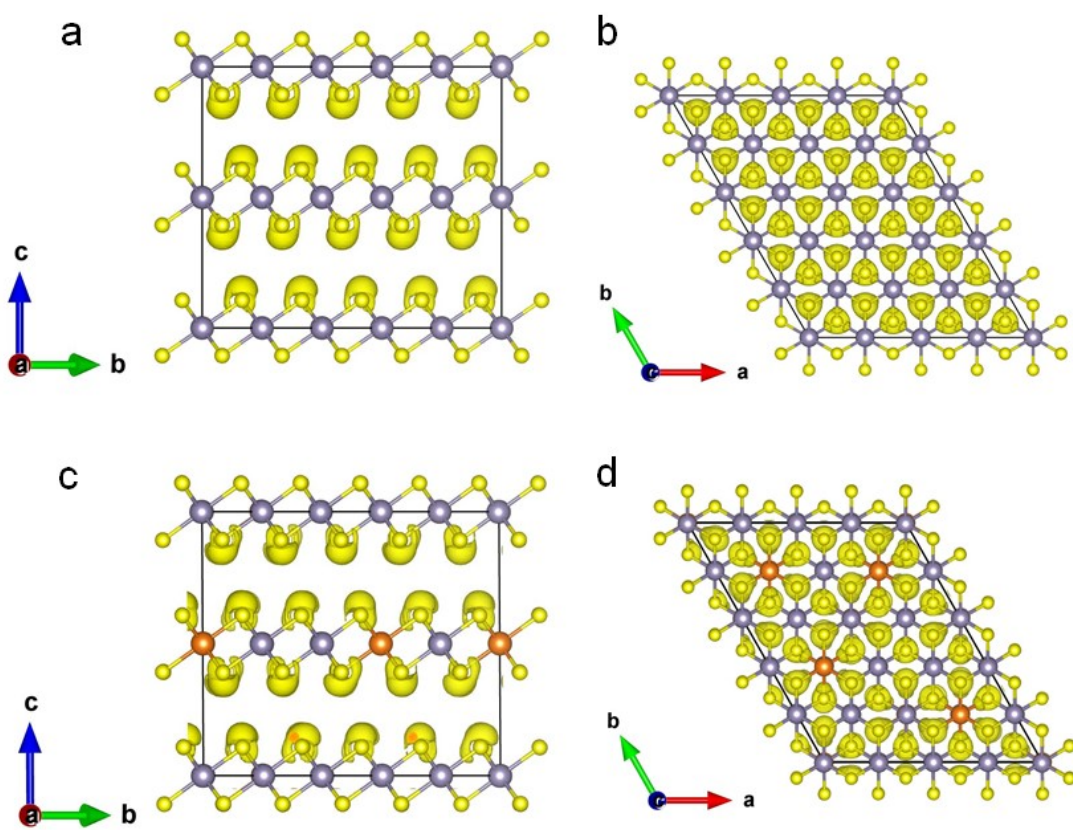

**Fig S18.** Electron Localization Function profile of pure (a-b) and Mg-doped (c-d) SnS<sub>2</sub> on (100) at different perspectives.

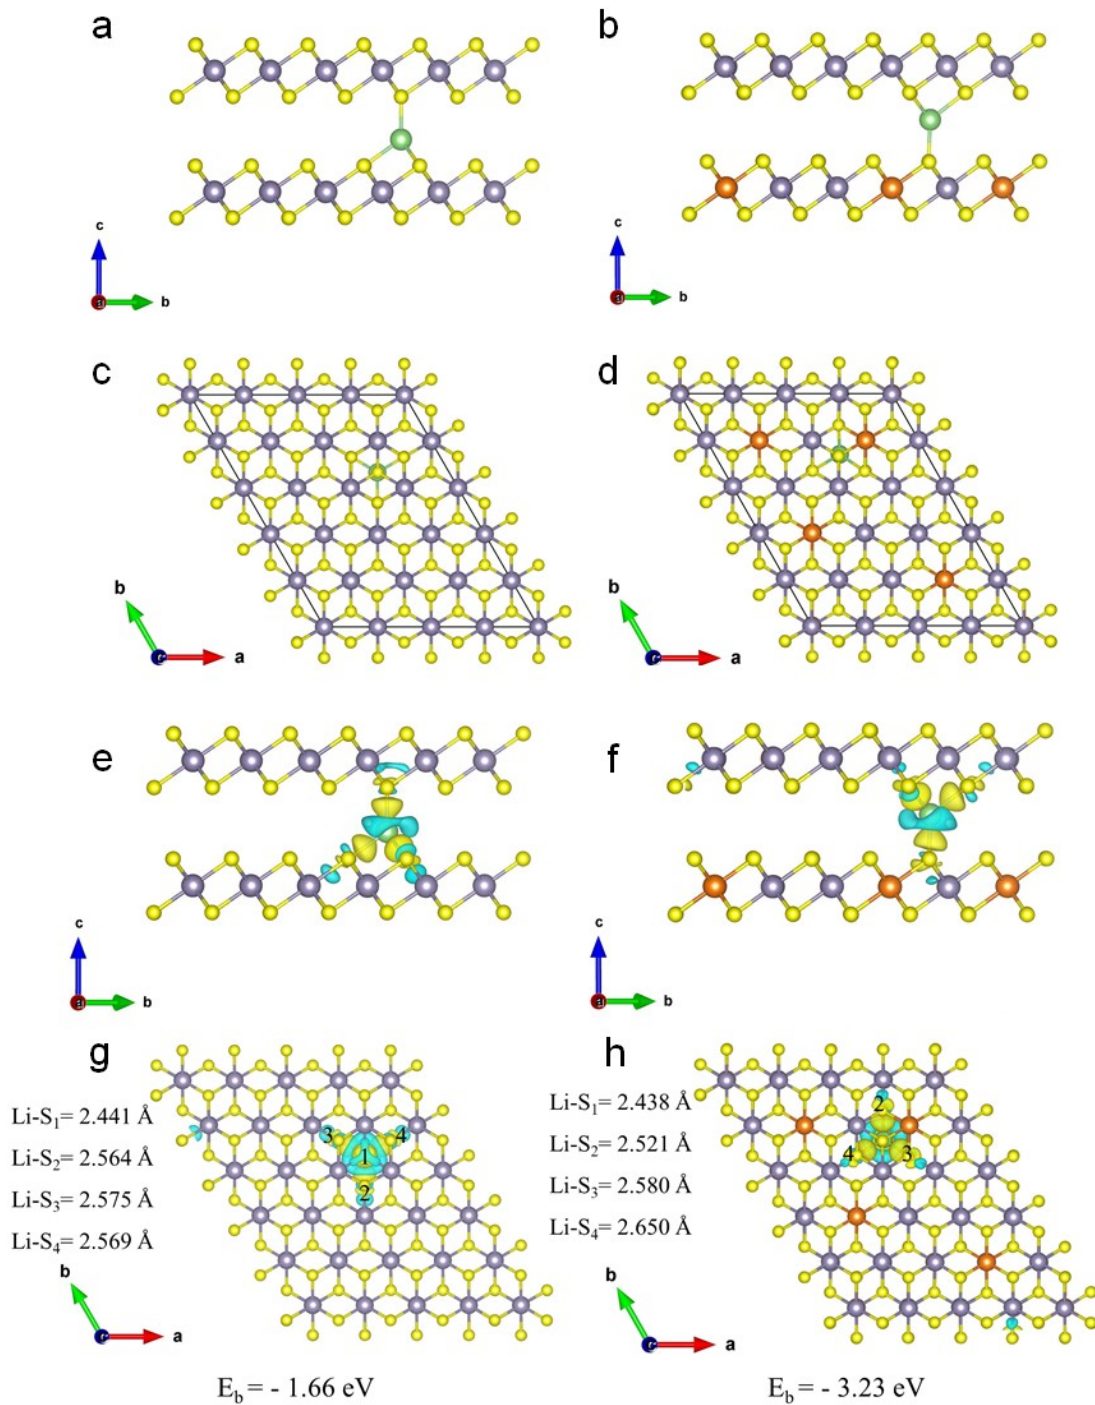

**Fig S19.** The binding stability of Li intercalated into interlayer for SnS<sub>2</sub> (a, c) and Mg-SnS<sub>2</sub> (b, d). The charge density differences after Li intercalated in to interlayer for SnS<sub>2</sub> (e, g) and Mg-SnS<sub>2</sub> (f, h).

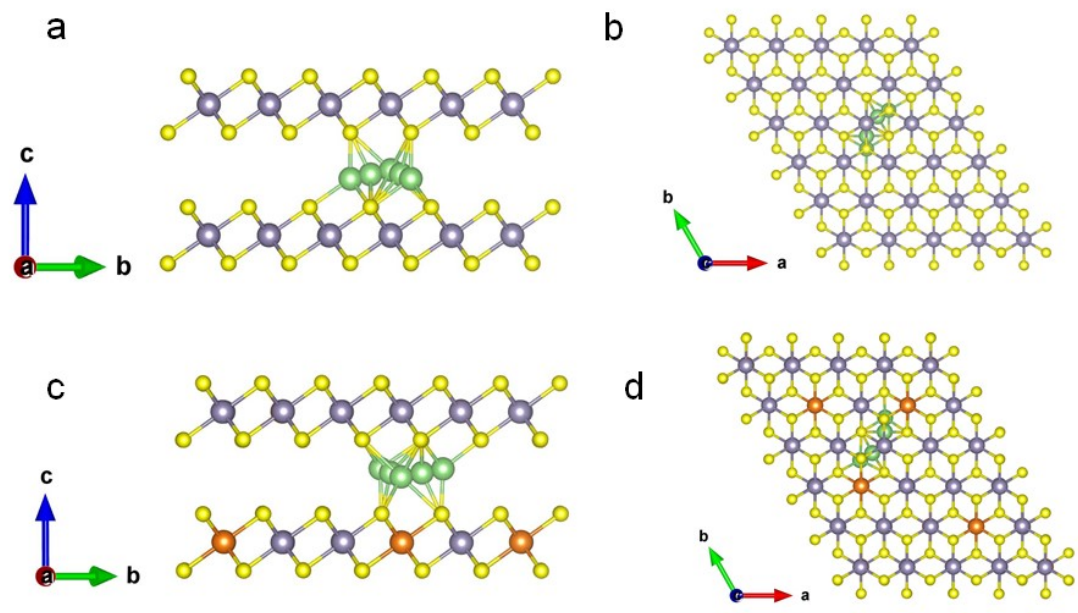

**Fig S20.** The Schematic representations of corresponding diffusion pathways for (a) SnS<sub>2</sub> and (d) Mg-SnS<sub>2</sub>.

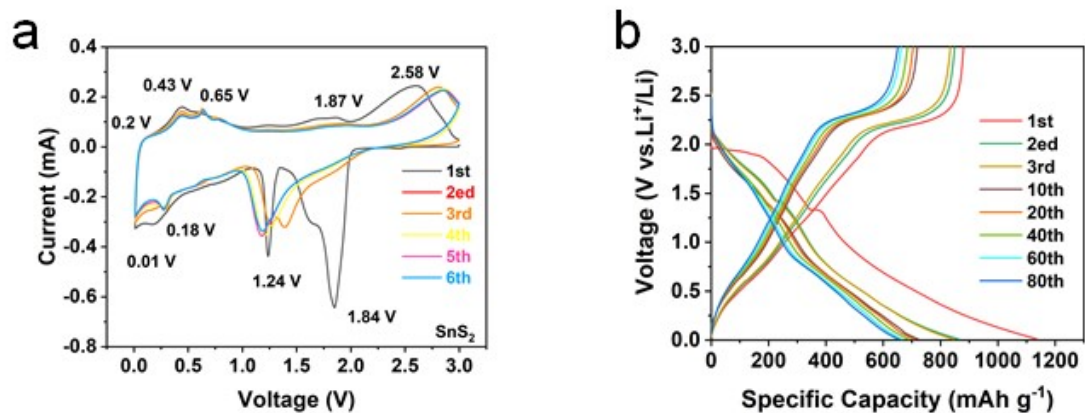

**Fig S21.** (a) CV curves of SnS<sub>2</sub>/CNFs at 0.1 mV s<sup>-1</sup>. (b) Charge-discharge profiles of SnS<sub>2</sub>/CNFs electrode at 0.3 A g<sup>-1</sup> and activated at 0.1 A g<sup>-1</sup> for three cycles.

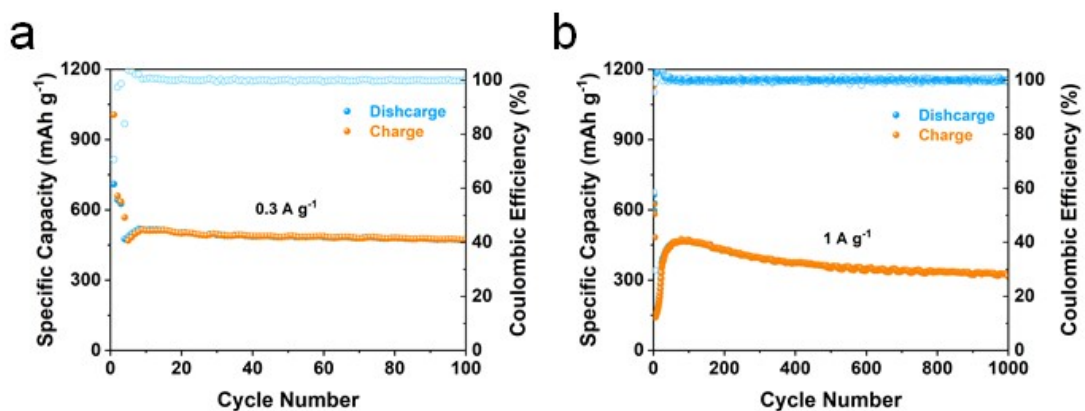

**Fig S22.** Cycling performance for Mg-SnS<sub>2</sub>/CNFs-2 at (a) 0.3 A g<sup>-1</sup> and (b) 1 A g<sup>-1</sup> (the electrode was activated at 0.1 A g<sup>-1</sup> for three cycles).



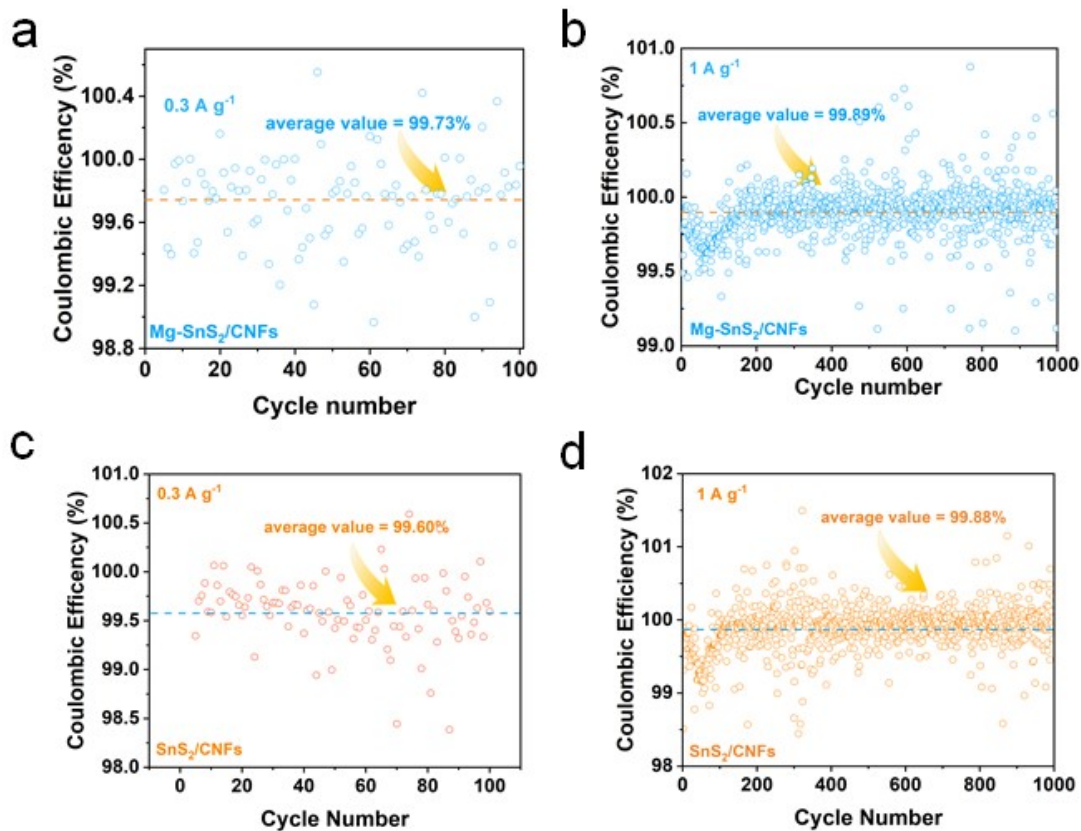

**Fig S23.** Coulombic efficiencies during cycling for (a, b) Mg-SnS<sub>2</sub>/CNFs and (c, d) SnS<sub>2</sub>/CNFs at 0.3 A g<sup>-1</sup> and 1 A g<sup>-1</sup>.

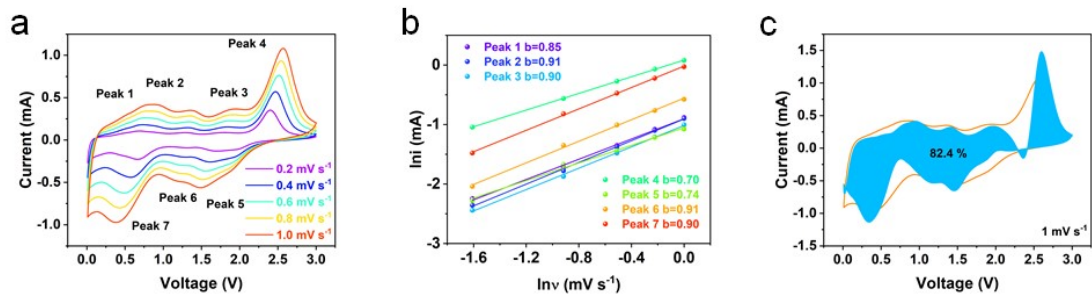

**Fig S24.** (a) Various scan rates of the SnS<sub>2</sub>/CNFs electrode. (b) Plots for b-value determination. (c) Sketch of the capacitive behavior of the SnS<sub>2</sub>/CNFs electrode at 1 mV s<sup>-1</sup>.

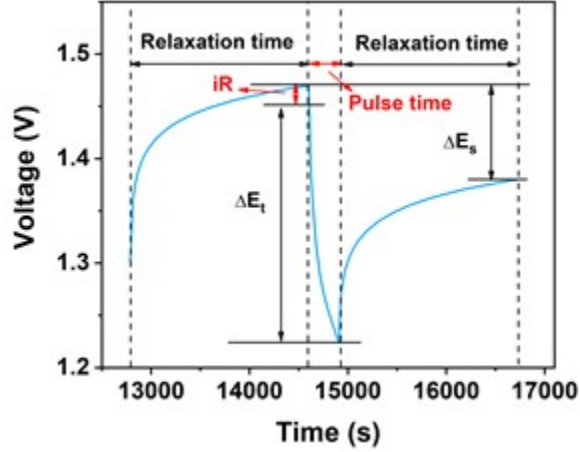

**Fig S25.** A single GITT curve.

The lithium diffusion coefficient was measured by using Galvanostatic intermittent titration technique (GITT) and calculated based on equation S1 as follows.

$$D = \frac{4L^2}{\pi\tau} \left( \frac{\Delta E_s}{\Delta E_t} \right)^2$$

Where  $t$  is the duration of the current pulse (s),  $\tau$  is the relaxation time (s), and  $\Delta E_s$  is the steady-state potential (V) by the current pulse.  $\Delta E_t$  is the potential change (V) during the constant current pulse after eliminating the  $iR$  drop (Figure S7).  $L$  is lithium-ion diffusion length (cm); for compact electrode, it is equal to thickness of electrode.

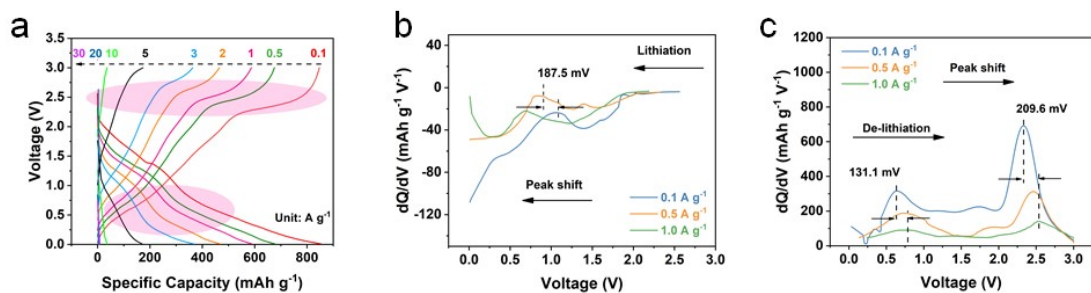

**Fig S26.** (a) Charge-discharge curves, and  $dQ/dV$  profiles of the (b) lithiation and (c) de-lithiation processes of the SnS<sub>2</sub>/CNFs electrode at 0.1, 0.5, and 1 A g<sup>-1</sup>.

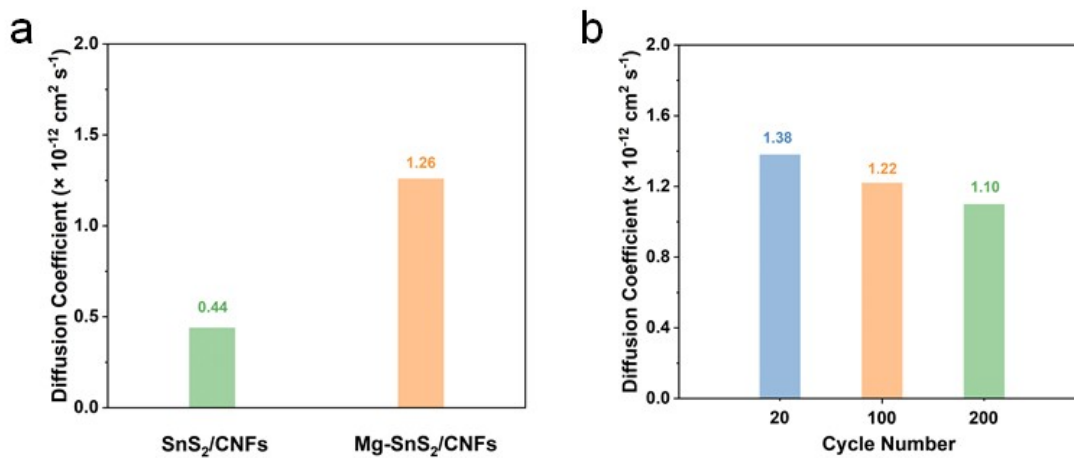

**Fig S27.** (a) Diffusion coefficient of SnS<sub>2</sub>/CNFs and Mg-SnS<sub>2</sub>/CNFs after 150 cycles. (b)



Diffusion coefficient of Mg-SnS<sub>2</sub>/CNFs after 20, 100, and 200 cycles.

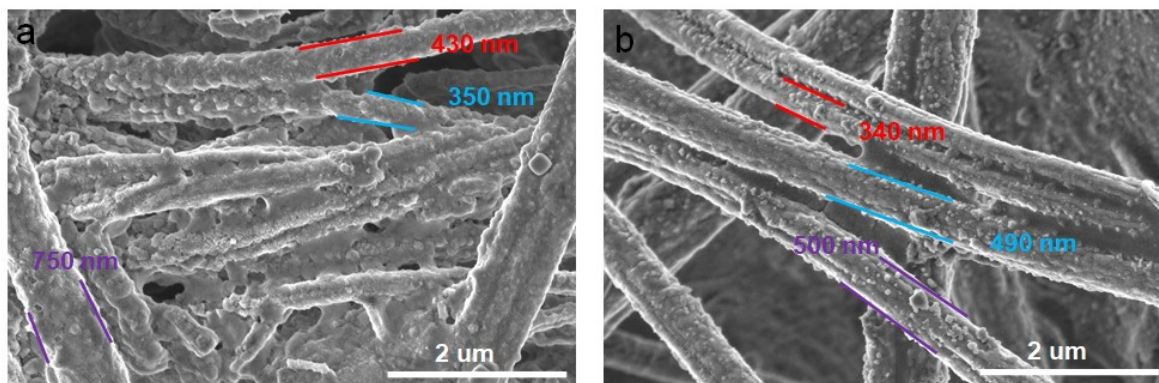

**Fig S28.** SEM images of (a) SnS<sub>2</sub>/CNFs and (b) Mg-SnS<sub>2</sub>/CNFs after 100 cycles.

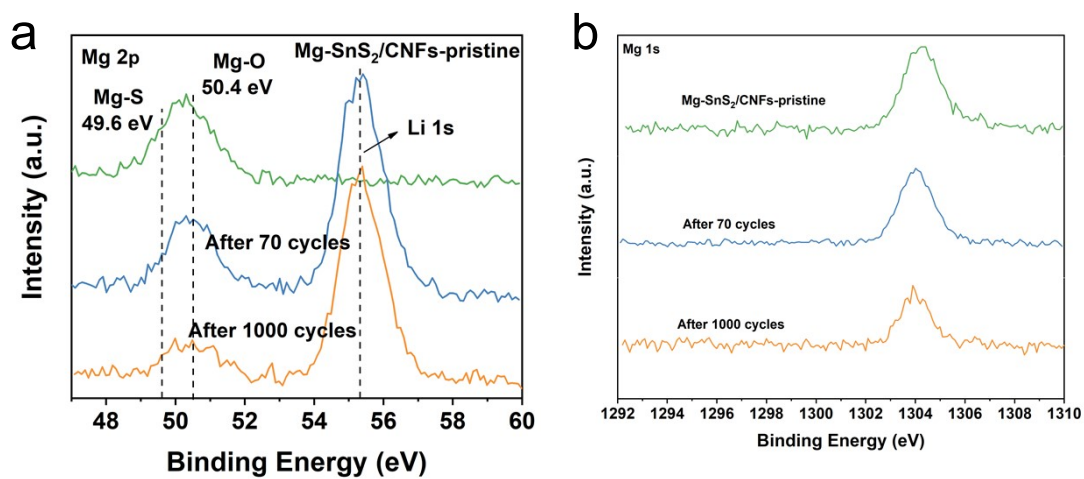

**Fig S29.** High-resolution spectrum of (a) Mg 2p and (b) Mg 1s.

**Table S1.** Elemental content of Mg-SnS<sub>2</sub>/CNFs and SnS<sub>2</sub>/CNFs by ICP.

|                           | Sn atomic (%) | Mg (atomic %) |
|---------------------------|---------------|---------------|
| Mg-SnS <sub>2</sub> /CNFs | 0.56          | 0.44          |

**Table S2.** Elemental content of Mg-SnS<sub>2</sub>/CNFs and SnS<sub>2</sub>/CNFs by XPS.

|                           |       | C     | N     | O     | S     | Sn    | Mg   |
|---------------------------|-------|-------|-------|-------|-------|-------|------|
| Mg-SnS <sub>2</sub> /CNFs | wt. % | 51.01 | 5.99  | 15.84 | 14.53 | 11.45 | 1.19 |
|                           | at. % | 67.81 | 6.83  | 15.81 | 7.24  | 1.54  | 0.78 |
| SnS <sub>2</sub> /CNFs    | wt. % | 42.93 | 9.13  | 12.71 | 14.48 | 20.77 | 0    |
|                           | at. % | 63.3  | 11.54 | 14.07 | 8.00  | 3.10  | 0    |

**Table S3.** The summary of the lithium storage performance of free-standing anodes.

| Materials                               | ICE [%]     | Capacity [mAh g <sup>-1</sup> ]<br>(Cycle, Current Density (A g <sup>-1</sup> )) | Rate Capacity [mAh g <sup>-1</sup> ]<br>(Current Density [A g <sup>-1</sup> ]) | Ref. |
|-----------------------------------------|-------------|----------------------------------------------------------------------------------|--------------------------------------------------------------------------------|------|
| <b>This Work</b>                        | <b>77.4</b> | <b>878.7 (100, 0.3)/ 792.5 (100, 1)</b>                                          | <b>354.7 (20)/ 207.1 (30)</b>                                                  | -    |
| SnS/CBC                                 | 61          | 872 (100, 0.1)                                                                   | 527 (2)                                                                        | [1]  |
| ALD-SnN <sub>x</sub>                    | 58          | 540 (70, 0.1)                                                                    | 342.7 (1.5)                                                                    | [2]  |
| LMNP@CS                                 | -           | 552 (1000, 1)                                                                    | 499 (2)                                                                        | [3]  |
| SnSb-CNTs@NCNFs                         | 75.0        | 815 (100, 0.1)                                                                   | 370 (5)                                                                        | [4]  |
| SnS/C-CP                                | 42          | 696.2 (200, 0.5)                                                                 | 423.2 (2)                                                                      | [5]  |
| SnS/C                                   | 70.3        | 548 (500, 0.2)                                                                   | 206 (4)                                                                        | [6]  |
| Mo-doped SnO <sub>2</sub>               | 40.8        | 670.5 (700, 0.5)                                                                 | 380 (2)                                                                        | [7]  |
| 10N-SnO <sub>2</sub> @CNF               | 62          | 909 (100, 0.1)                                                                   | 535 (5)                                                                        | [8]  |
| V <sub>2</sub> O <sub>3</sub> /MCCNFs-3 | 65.5        | 881.1 (240, 0.1)                                                                 | 456.8 (5)                                                                      | [9]  |
| FNiO/GP                                 | 67          | 359 (600, 1)                                                                     | 340 (2)                                                                        | [10] |
| BP@NC                                   | 57.6        | 1085.1 (200, 0.1)                                                                | 446.8 (2)                                                                      | [11] |
| CC-Co-Ti-350                            | 74          | 1070 (600, 0.2)                                                                  | 400 (1.6)                                                                      | [12] |
| Fe <sub>x</sub> O <sub>y</sub> /NC-MOG  | 63.3        | 879.7 (50, 0.1)                                                                  | 629.3 (1)                                                                      | [13] |
| P@PMCNFs/<br>CNTs                       | -           | 802.3 (500, 1)                                                                   | 601 (3)                                                                        | [14] |
| TiO <sub>2</sub> @MCNFs                 | 74.2        | 617 (100, 0.1)                                                                   | 210 (1)                                                                        | [15] |

**Table S4.** The fitting resistance results for SnS<sub>2</sub>/CNFs and Mg-SnS<sub>2</sub>/CNFs after 150 cycles.

|                            | R <sub>s</sub><br>[Ω] | R <sub>SEI</sub><br>[Ω] | R <sub>ct</sub><br>[Ω] | CPE <sub>SEI</sub><br>[μMho] | CPE <sub>ct</sub><br>[μMho] |
|----------------------------|-----------------------|-------------------------|------------------------|------------------------------|-----------------------------|
| SnS <sub>2</sub> /CNFs     | 5.56                  | 117                     | 57.9                   | 81.3                         | 2610                        |
| Mg- SnS <sub>2</sub> /CNFs | 6.34                  | 31.8                    | 38.4                   | 270                          | 44800                       |

**Table S5.** The fitting resistance results for SnS<sub>2</sub>/CNFs and Mg-SnS<sub>2</sub>/CNFs at different cycles.

|            | R <sub>s</sub><br>[Ω] | R <sub>SEI</sub><br>[Ω] | R <sub>ct</sub><br>[Ω] | CPE <sub>SEI</sub><br>[μMho] | CPE <sub>ct</sub><br>[μMho] |
|------------|-----------------------|-------------------------|------------------------|------------------------------|-----------------------------|
| 20 cycles  | 4.08                  | 96.8                    | 58.7                   | 10.0                         | 4710                        |
| 100 cycles | 5.00                  | 54.1                    | 51.1                   | 24.8                         | 2180                        |
| 200 cycles | 5.42                  | 21.1                    | 25.4                   | 389                          | 38500                       |

**Table S6.** The fitting resistance results for SnS<sub>2</sub>/CNFs and Mg-SnS<sub>2</sub>/CNFs at different temperatures.

|                               | R <sub>s</sub><br>[Ω] | R <sub>SEI</sub><br>[Ω] | R <sub>ct</sub><br>[Ω] | CPE <sub>SEI</sub><br>[μMho] | CPE <sub>ct</sub><br>[μMho] |
|-------------------------------|-----------------------|-------------------------|------------------------|------------------------------|-----------------------------|
| SnS <sub>2</sub> /CNFs-25     | 5.00                  | 73.9                    | 142                    | 24.7                         | 1230                        |
| SnS <sub>2</sub> /CNFs-45     | 4.19                  | 21.6                    | 110                    | 27.4                         | 1260                        |
| SnS <sub>2</sub> /CNFs-65     | 3.32                  | 3.43                    | 82.1                   | 4.57                         | 1870                        |
| Mg- SnS <sub>2</sub> /CNFs-25 | 4.83                  | 80                      | 44.7                   | 29.9                         | 860                         |
| Mg- SnS <sub>2</sub> /CNFs-45 | 4.02                  | 19.8                    | 33.4                   | 40.8                         | 1460                        |
| Mg- SnS <sub>2</sub> /CNFs-65 | 3.77                  | 9.45                    | 28.2                   | 36.6                         | 1480                        |

**Table S7.** The elemental content of C, O, S, Sn and Mg before and after cycling.

|                                      | Cycles | C     | O     | S    | Sn   | Mg   |
|--------------------------------------|--------|-------|-------|------|------|------|
| Mg-SnS <sub>2</sub> /CNFs<br>(at. %) | 0      | 72.78 | 16.97 | 7.77 | 1.65 | 0.84 |
|                                      | 70     | 45.59 | 49.07 | 2.51 | 2.09 | 0.75 |
|                                      | 1000   | 45.85 | 50.00 | 3.25 | 0.68 | 0.21 |
| SnS <sub>2</sub> /CNFs<br>(at. %)    | 0      | 71.55 | 15.90 | 9.04 | 3.50 | 0    |
|                                      | 70     | 44.23 | 49.66 | 3.96 | 2.15 | 0    |
|                                      | 1000   | 41.18 | 50.28 | 5.69 | 2.29 | 0    |



## References

- 1 F. Yuan, Y. Huang, J. Qian, M. M. Rahman, P. M. Ajayan and D. Sun, *Carbohydr. Polym.*, 2021, **255**, 117400.
- 2 M. Z. Ansari, D. K. Nandi, P. Janicek, S. A. Ansari, R. Ramesh, T. Cheon, B. Shong and S.-H. Kim, *ACS Appl. Mater. Interfaces*, 2019, **11**, 43608-43621.
- 3 J. Zhu, Y. Wu, X. Huang, L. Huang, M. Cao, G. Song, X. Guo, X. Sui, R. Ren and J. Chen, *Nano Energy*, 2019, **62**, 883-889.
- 4 R. Chen, X. Xue, Y. Hu, W. Kong, H. Lin, T. Chen and Z. Jin, *Nanoscale*, 2019, **11**, 13282-13288.
- 5 J. Zheng, Y. Luo, D. Xie, X. Xiong, Z. Lin, G. Wang, C. Yang and M. Liu, *J. Alloys Compd.*, 2019, **779**, 67-73.
- 6 J. Xia, L. Liu, S. Jamil, J. Xie, H. Yan, Y. Yuan, Y. Zhang, S. Nie, J. Pan, X. Wang and G. Cao, *Energy Storage Mater.*, 2019, **17**, 1-11.
- 7 Y. Chen, D. Ge, J. Zhang, R. Chu, J. Zheng, C. Wu, Y. Zeng, Y. Zhang and H. Guo, *Nanoscale*, 2018, **10**, 17378-17387.
- 8 H.-J. Shin, T. H. Kim, S. Abbas, J. Cho and H. Y. Ha, *Chem. Eng. J.*, 2021, **412**, 128614.
- 9 T. Zhang, L. Zhang, L. Zhao, X. Huang, W. Li, T. Li, T. Shen, S. Sun and Y. Hou, *Small*, 2020, **16**, 202005302.
- 10 J. Fu, W. Kang, X. Guo, H. Wen, T. Zeng, R. Yuan and C. Zhang, *J. Energy Chem.*, 2020, **47**, 172-179.
- 11 R. Wang, X. Dai, Z. Qian, S. Zhong, S. Chen, S. Fan, H. Zhang and F. Wu, *ACS Appl. Mater. Interfaces*, 2020, **12**, 31628-31636.
- 12 S. Fu, J. Chen, X. Wang, Q. He, S. Tong and M. Wu, *Small*, 2020, **16**, 2000040.
- 13 D. H. Yang, L. Kong, M. Zhong, J. Zhu and X. H. Bu, *Small*, 2019, **15**, e1804058.

- 14 S. Liang, X. Pei, W. Jiang, Z. Xu, W. Wang, K. Teng, C. Wang, H. Fu and X. Zhang, *Electrochim. Acta*, 2019, **322**, 134696.
- 15 X. Li, B. Zhou, W. Wang, Z. Xu, N. Li, L. Kuang, C. Li, W. Mai, H. Fu and H. Lv, *J. Alloys Compd.*, 2017, **706**, 103-109.
